# Supplementary material
Source: publisher site journal article supplement (https://thieme-connect.com/media/10.1055-s-00035024/201106/supmat/10-1160-th11-07-0491-supp.pdf)
Supplement: Supplementary file 1 [file 10-1160-th11-07-0491-supp.pdf]

Supplementary file to Kobsar et al. “*Neisseria meningitidis* induces platelet inhibition and increases vascular endothelial permeability via nitric oxide regulated pathways” (Thromb Haemost 2011; 106.6)

Supplementary Figure 1

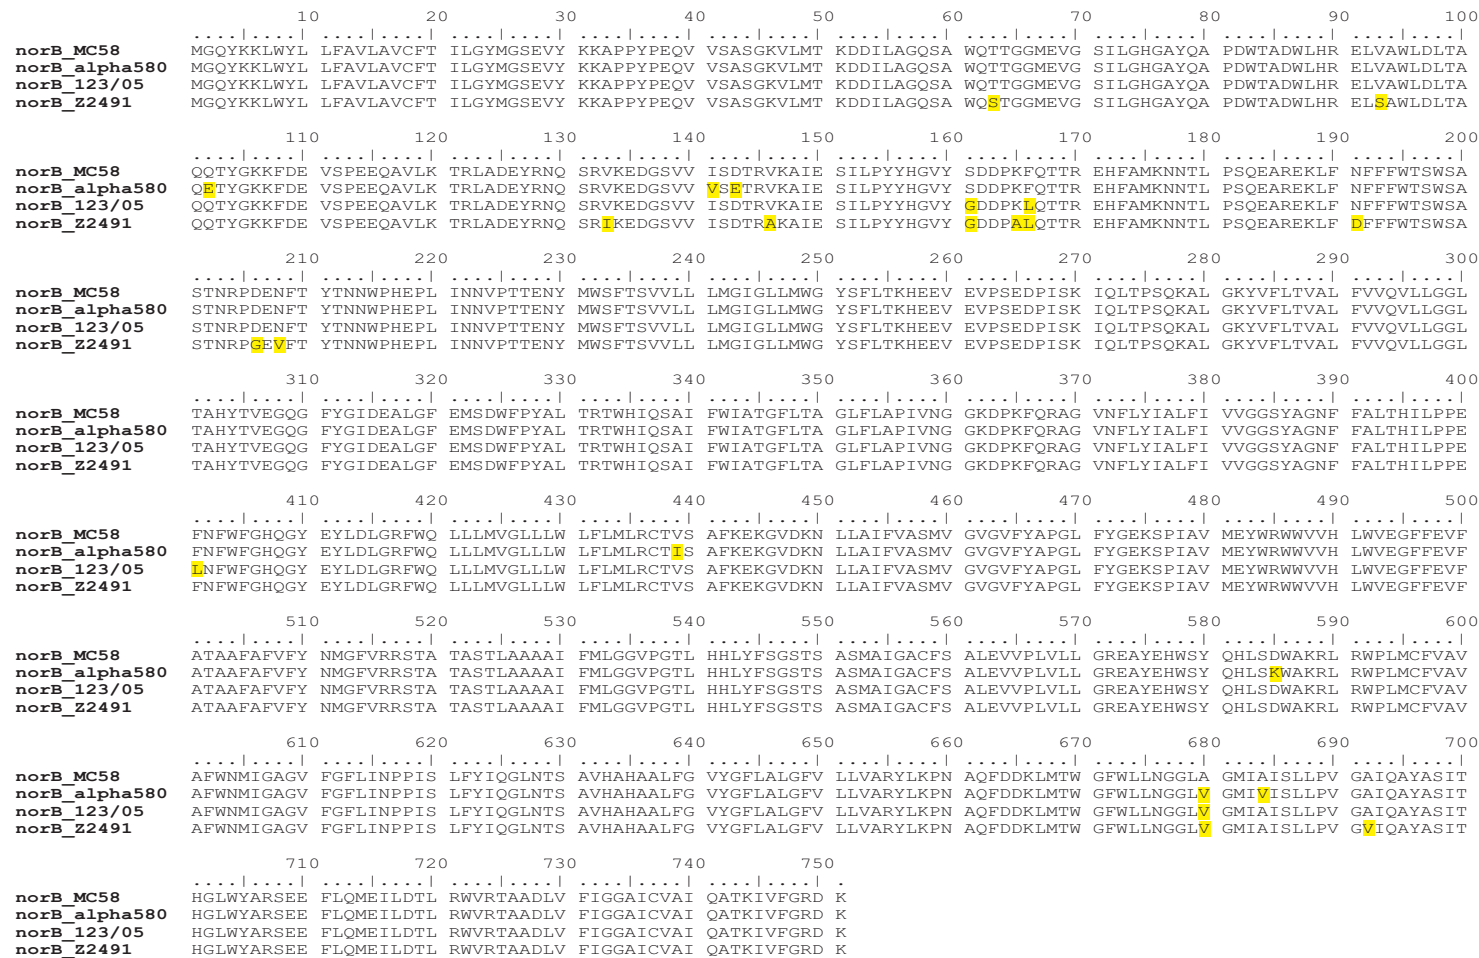

Suppl. Figure 1: Amino acid sequence alignment obtained for the protein NorB deduced from the gene sequences for the analysed *N. meningitidis* strain 123/05 and  $\alpha$ 580, compared with the MC58 and Z2491 nitrite oxide reductase. Colour (yellow) indicates point mutations.
